# 1 To the canopy and beyond: Air samples 2 reveal wind dispersal as a driver of 3 ubiquitous protistan pathogen assembly 4 in tree canopies

5 Robin-Tobias Jauss<sup>a#[co]</sup> & Anne Nowack<sup>a[co]</sup>, Susanne Walden<sup>b</sup>, Ronny Wolf<sup>a</sup>, Stefan  
6 Schaffer<sup>a</sup>, Barbara Schellbach<sup>c</sup>, Michael Bonkowski<sup>b</sup>, Martin Schlegel<sup>a,d,#</sup>

7 <sup>a</sup> University of Leipzig, Institute of Biology, Molecular Evolution & Animal Systematics,  
8 Talstraße 33, 04103 Leipzig

9 <sup>b</sup> University of Cologne, Institute of Zoology, Terrestrial Ecology, Zùlpicher Straße  
10 47b, 50674 Köln

11 <sup>c</sup> Max Planck Institute for Evolutionary Anthropology, Department of Evolutionary  
12 Genetics, Deutscher Platz 6, 04103 Leipzig

13 <sup>d</sup> German Centre for Integrative Biodiversity Research (iDiv) Halle Jena Leipzig,  
14 Deutscher Platz 5e, 04103 Leipzig

15 <sup>[co]</sup> These authors contributed equally and should be considered joint first author.  
16 Author order was determined in order of decreasing seniority

17 # To whom correspondence should be addressed: [jauss@uni-leipzig.de](mailto:jauss@uni-leipzig.de),  
18 [schlegel@uni-leipzig.de](mailto:schlegel@uni-leipzig.de)

19 **Keywords: Airborne Microorganisms, Protists, Forest Ecosystems, Canopies,**  
20 **Pathogens**

## 21 Abstract

22 We analyzed air dispersal of the protistan phyla Cercozoa and Oomycota with an air sampler  
23 near the ground (~2 m) and in tree crowns (~25 m) of three tree species (oak, linden and  
24 ash) in a temperate floodplain forest in March (before leafing) and May (after leaf unfolding)  
25 with a cultivation-independent high throughput metabarcoding approach. Both, Cercozoa  
26 and Oomycota, contain important pathogens of forest trees and other vegetation. We found  
27 a high diversity of Cercozoa and Oomycota in air samples with 122 and 81 OTUs,  
28 respectively. Especially oomycetes showed a high temporal variation in beta diversity  
29 between both sampling dates. Differences in community composition between air samples

30 in tree canopies and close to the ground were however negligible, and also tree species  
31 identity did not affect communities in air samples, indicating that the distribution of protistan  
32 propagules through the air was not spatially restricted in the forest ecosystem. OTUs of plant  
33 pathogens, whose host species that did not occur in the forest, demonstrate wind dispersal  
34 of propagules from outside the forest biome. Overall, our results lead to a better  
35 understanding of the stochastic processes of wind dispersal of protists and protistan  
36 pathogens, a prerequisite to understand the mechanisms of their community assembly in  
37 forest ecosystems.

## 38 Importance

39 Wind dispersal has been shown to play a crucial role in protistan community assembly. The  
40 protistan taxa Cercozoa and Oomycota contain important plant parasites with a major  
41 ecologic and economic impact. However, comprehensive assessments of cercozoan and  
42 oomycete diversity in forest air samples were lacking. Using a cultivation-independent high  
43 throughput metabarcoding approach, we analyzed cercozoan and oomycete air dispersal in  
44 forest floors and the canopy region – a potential filter for microbial propagules. Our study  
45 provides insights into the diversity and community assembly of protists within the air,  
46 contributing to a better understanding which factors drive the distribution of plant pathogens  
47 within forest ecosystems.

## 48 1. Introduction

49 The air is an effective means of long-distance propagation for a wide range of microbial  
50 organisms (Foissner & Hawksworth, 2009; Pepper & Dowd, 2009). The phyllosphere – and  
51 especially the crowns of trees – are the largest biological interface between the soil and the  
52 atmosphere (Ozanne et al., 2003; Ellwood & Foster, 2004), which therefore may act as a  
53 huge natural filter for airborne microbial propagules, including unicellular Eukaryotes  
54 (Protists). Within the paraphyletic taxon of protists, the group of Cercozoa (Rhizaria) are  
55 highly diverse in morphology and physiology and show a high functional and ecological

56 variety (Bass et al., 2009; Harder et al., 2016). They dominate terrestrial habitats (Urich et  
57 al., 2008; Voss et al., 2019) and harbor important plant pathogens, such as the Endomyxa,  
58 which have recently been elevated from the Cercozoa into a separate phylum (Cavalier-  
59 Smith et al., 2018). Another protistan taxon, the Oomycetes (Stramenopiles), contain  
60 important parasites of forest trees, and many lineages produce caducous sporangia for  
61 dissemination (Goheen & Frankel, 2009; Robideau et al., 2011; Lang-Yona et al., 2018).  
62 With almost 800 described species, Oomycota are reported to have a broad distribution and  
63 a wide variety of ecological roles (Robideau et al., 2011; Thines, 2014; Judelson, 2017).  
64 Further, it is one of the eukaryotic groups with a great impact on ecosystems, as well as on  
65 economics and human health: the most famous species is *Phytophthora infestans*, which  
66 causes the potato blight. In the 1840s it led to the great famine in Ireland followed by massive  
67 emigration (Lara & Belbahri, 2011; Robideau et al., 2011).

68 Protists can be passively disseminated over long distances by viable propagules, mostly as  
69 resting stages (cysts), while some groups, especially pathogens with more complex life  
70 cycles, also form sporangia for dispersal (Cowling, 1994; Kageyama & Asano, 2009). Cysts  
71 are formed under unfavorable conditions, e.g. due to dryness, lack of food, or microbial  
72 antibiotics (Petz & Foissner, 1988; Adl & Gupta, 2006; Jousset et al., 2006), and it has been  
73 assumed that the cyst bank plays an important role for the resilience of protists and their  
74 functions in terrestrial environments (Geisen et al., 2017). Viable protist cysts can be  
75 retrieved from soils even after decades (Moon-van der Staay et al., 2006; Kageyama &  
76 Asano, 2009), leading to the long-standing question of how cosmopolitan protists are (Finlay,  
77 2002; Fenchel & Finlay, 2004; Foissner, 2009).

78 Finlay et al. (2001) proposed that the spatial distribution of protistan propagules is  
79 influenced by several randomizing factors, such as soil particles dispersed by wind,  
80 convective transport, percolating rainwater, fog or animals. Rogerson and Detwiler (1999)  
81 determined that on average  $0.25 \text{ cysts m}^{-3}$  are contained in the air depending on wind speed

82 and time since last precipitation. Using a molecular approach, Genitsaris et al. (2014) came  
83 to generally similar conclusions, while they further detected operational taxonomic units  
84 (OTUs) with constant presence as well as OTUs exhibiting seasonal variation. High humidity  
85 increases the chance of survival of transported microbes and promotes their deposition  
86 (Fuzzi et al., 1997; Evans et al., 2019) and airborne microorganisms can be transported in  
87 fog droplets by atmospheric turbulence over long distances (Fuzzi et al., 1997; Amato et al.,  
88 2005).

89 Recently, Jauss et al. (2020) confirmed a ubiquitous distribution of Cercozoa and Oomycota  
90 in a floodplain forest, despite strong differences in community composition of different  
91 microhabitats related to differences in the relative abundance of taxa. This led to the  
92 conclusion that within forest ecosystems both cercozoans and oomycetes can colonize most  
93 habitats, in which they then however do not perform similarly well due to habitat filtering.  
94 One reason for this ubiquitous presence of these protists could be wind dispersal.

95 Here, we studied the air dispersal of Cercozoa, Endomyxa and Oomycota by a cultivation-  
96 independent high throughput metabarcoding approach to analyze protistan diversity in the  
97 air surrounding tree canopies and near the ground of a temperate floodplain forest, to gain  
98 a deeper insight into the mechanisms how protists and their pathogenic lineages are  
99 distributed in the environment. These examinations tackled three hypotheses: (1) Wind  
100 dispersal explains the ubiquitous presence of these protists in the floodplain forest. (2) There  
101 are differences in the distribution in the vertical plane as a strong discrepancy between  
102 canopy and ground habitats was previously described. (3) Temporal variation of wind  
103 dispersed propagules further drives the community and pathogen assembly in forest  
104 ecosystems.

## 2. Material and Methods

### 2.1. Sampling and DNA extraction

105  
106  
107 Air samples were taken in a temperate deciduous floodplain forest in the northwest of the  
108 city of Leipzig, Germany (51.3657 N, 12.3094 E) with a MicroBio MB2 Bioaerosol Sampler  
109 (Cantium Scientific, Dartford, UK) containing 1% agar plates. The samples were collected  
110 under defined conditions drawing 100 l/min of air for ten minutes in two strata: (1) near the  
111 ground (~2m) and (2) in ~25m height in tree canopies with the help of the Leipzig Canopy  
112 Crane (LCC) facility. Two samplings were carried out – one in March and one in May 2019.  
113 For each sampling, three tree species with three replicates each were chosen (*Quercus*  
114 *robur*, *Tilia cordata* and *Fraxinus excelsior*). As non-arboreal control, samples were also taken  
115 on the crane tracks near the ground and at canopy height. Two plates per stratum and of  
116 each replicated tree species were collected, yielding 40 plates per sampling. After air  
117 sampling, the agar plates were taken out of the instrument, sealed with parafilm to prevent  
118 contaminations and frozen until the DNA was extracted with the DNeasy PowerSoil® Kit  
119 according to the instructions supplied by the manufacturer. Weather conditions were tracked  
120 with a WebVIS data logger attached to the crane (Umweltanalytische Produkte GmbH,  
121 Ibbenbüren, Germany) (Table 1).

Table 1: Weather conditions at the sampling days in March and May 2019.

|                          | March                       | May                    |
|--------------------------|-----------------------------|------------------------|
| Average temperature [°C] | 6.5                         | 14.3                   |
| Average humidity [%]     | 59.4                        | 75.0                   |
| Average wind speed [m/s] | 4.01                        | 3.23                   |
| Last precipitation event | Immediately before sampling | 2 days before sampling |

122

## 123 2.2. PCR amplification and sequencing

124 DNA was amplified in duplicates with tagged oomycete- and cercozoan-specific primers  
125 (Fiore-Donno & Bonkowski, 2020; Jauss et al., 2020; Fiore-Donno et al., 2020)  
126 (Supplementary Tables 1-2). PCR-products were purified following the directions of the  
127 NucleoSpin® PCR clean-up protocol. Afterwards, DNA concentrations were measured with  
128 the Qubit™4 fluorometer in combination with the Qubit™ dsDNA HS Assay Kit. For  
129 consecutive Illumina MiSeq Sequencing, a library was prepared following the Meyer and  
130 Kircher (2010) protocol. DNA concentrations were checked repeatedly before and after  
131 Illumina sequencing by utilization of DNA chips analyzed with the Agilent 2100 Bioanalyzer.  
132 Between the steps of library preparation, reaction clean-up was performed with the AMPure  
133 XP System using carboxyl coated magnetic beads (SPRI beads). Subsequent steps and the  
134 Illumina MiSeq sequencing itself were performed by the sequencing team of the Max Planck  
135 Institute for Evolutionary Anthropology in Leipzig, Germany.

## 136 2.3. Sequence processing and statistical analyses

137 Bioinformatic and statistical analyses followed the pipeline described in Jauss et al. (2020).  
138 Briefly, resulting reads were merged and clustered into operational taxonomic units (OTUs)  
139 using a custom pipeline utilizing cutadapt v1.18 (Martin, 2011), Swarm v2.2.2 (Mahé et al.,  
140 2015) and VSEARCH v2.10.3 (Rognes et al., 2016). OTUs were then annotated using  
141 NCBI's non-redundant nucleotide database and the Protist Ribosomal Reference Database  
142 (Guillou et al., 2013) for oomycete and cercozoan OTUs, respectively (Supplementary  
143 Tables 3-4). OTUs resembling non-oomycete or non-cercozoan sequences were excluded.  
144 Samples with less than 5 OTUs or with a sequencing depth lower than 20617 reads  
145 (Oomycota) and 16922 reads (Cercozoa) were omitted. Statistical analyses of alpha and  
146 beta diversity and final visualizations were performed in R v3.5.3 (R Core Team, 2019) with  
147 the packages vegan (Oksanen et al., 2019), ggplot2 (Wickham, 2016) and ggraph  
148 (Pedersen, 2020).

## 149 3. Results

### 150 3.1. Amplification, sequencing and bioinformatic pipeline

151 After DNA isolation, all oomycete samples were amplified successfully whereas nine out of  
152 20 cercozoan samples had to be excluded due to the failure of successful amplification of  
153 duplicates. Further, samples containing less than 1ng/μl DNA were excluded from  
154 subsequent processing, as well as samples with a low sequencing depth (see 2.3), yielding  
155 9 cercozoan samples from March and 4 from May, as well as 13 oomycete samples from  
156 March and 20 from May (Supplementary Table 5). Of cercozoan sequences, 94.4% could  
157 be merged with a mean length of  $370\pm 35$  bp resulting in 122 OTUs in total. Of oomycete  
158 sequences, 92.6% of derived 300 bp long paired-end sequences could be merged and the  
159 mean fragment length accounted for  $285\pm 38$  bp, which were finally clustered into 81 OTUs.

### 160 3.2. Alpha diversity

161 Neither species richness nor Shannon-diversity nor evenness of Cercozoa or Oomycota  
162 differed between tree species, ground and canopy or non-arboreal controls, although  
163 variation of canopy samples was much lower than of ground samples in Cercozoa (e.g.  
164 species richness  $CV_{\text{Ground}} = 42.3\%$ ,  $CV_{\text{Canopy}} = 5.6\%$ ). However, Shannon-diversity and  
165 evenness of both protistan groups and species richness of oomycetes were higher in May  
166 than in March, indicating that the tree foliage in May did not restrict protistan distribution  
167 (Figure 1).

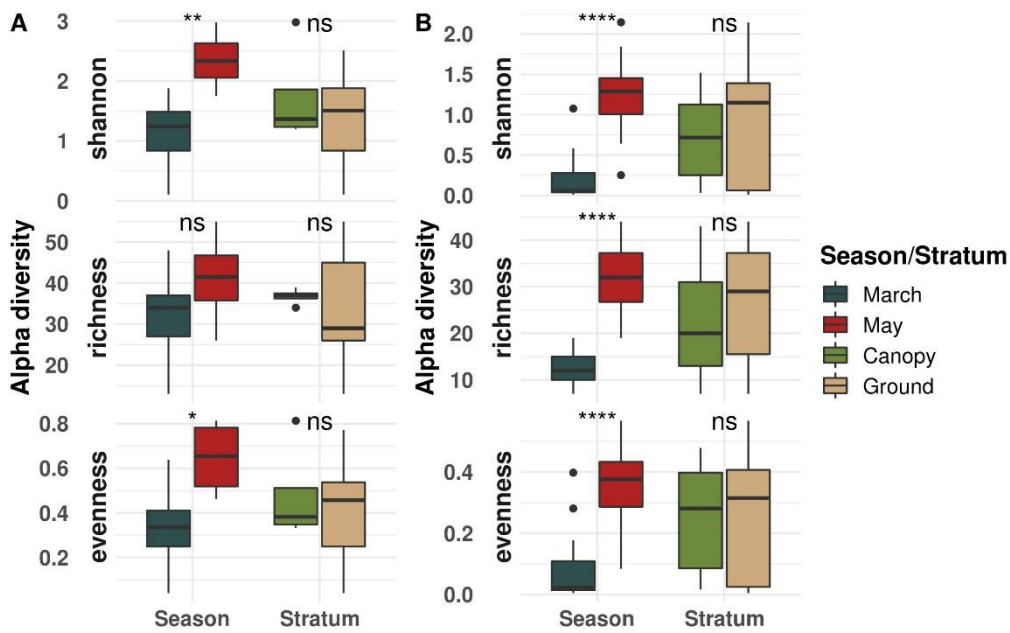

Figure 1: Boxplot of alpha diversity indices of cercozoan (A) and oomycete (B) samples. Pairwise comparisons of March and May samples and canopy and ground samples, respectively are shown. Significance was tested with Wilcoxon Sign test and is indicated by asterisks (ns =  $p > 0.05$ , \* =  $p < 0.05$ , \*\* =  $p < 0.01$ , \*\*\* =  $p < 0.001$ , \*\*\*\* =  $p < 0.0001$ ).

168

### 169 3.3. Beta diversity

170 For Cercozoa,  $\beta$ -diversity of air samples did not differ between tree species (permANOVA  
 171  $R^2=0.165$ ,  $p=0.514$ ), ground vs. canopy stratum (permANOVA  $R^2=0.093$ ,  $p=0.296$ ) nor  
 172 sampling season (permANOVA  $R^2=0.101$ ,  $p=0.168$ ). However, variation of  $\beta$ -diversity was  
 173 much lower in May compared to March, and lower in canopy samples compared to ground  
 174 samples (Figure 2A). Oomycete communities differed between sampling seasons  
 175 (permANOVA  $R^2=0.170$ ,  $p=0.001$ ), but not between tree species (permANOVA  $R^2=0.080$ ,  
 176  $p=0.719$ ) or the strata ground and canopy (permANOVA  $R^2=0.037$ ,  $p=0.259$ ) (Figure 2B).



177

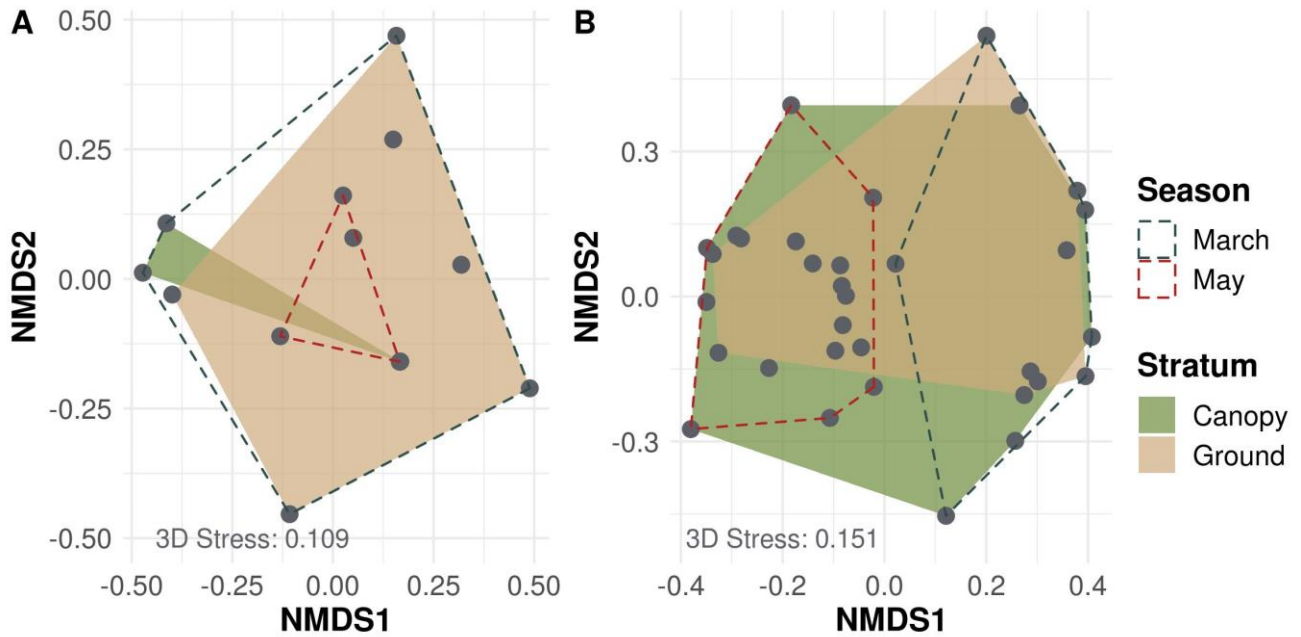

Figure 2: Non-metric multidimensional scaling (NMDS) plot of cercozoan (A) and oomycete (B) samples. Canopy and ground samples show a large overlap, while in oomycetes the March and May samples show a strong separation.

178

### 179 3.4. Taxonomic diversity

180 Cercozoan OTUs were dominated by the orders Cryomonadida and Glissomonadida,  
181 whereas the least abundant ones were Marimonadida and an unspecified order named  
182 Cercozoa\_XX, comprising undescribed cercozoan lineages (Figure 3A). We detected no  
183 OTUs assigned to the plant parasitic group of Endomyxa. Oomycete OTUs were almost  
184 exclusively dominated by Peronosporales (Figure 3B), with only few members of the  
185 Pythiales, and the Albuginales being the least abundant order.

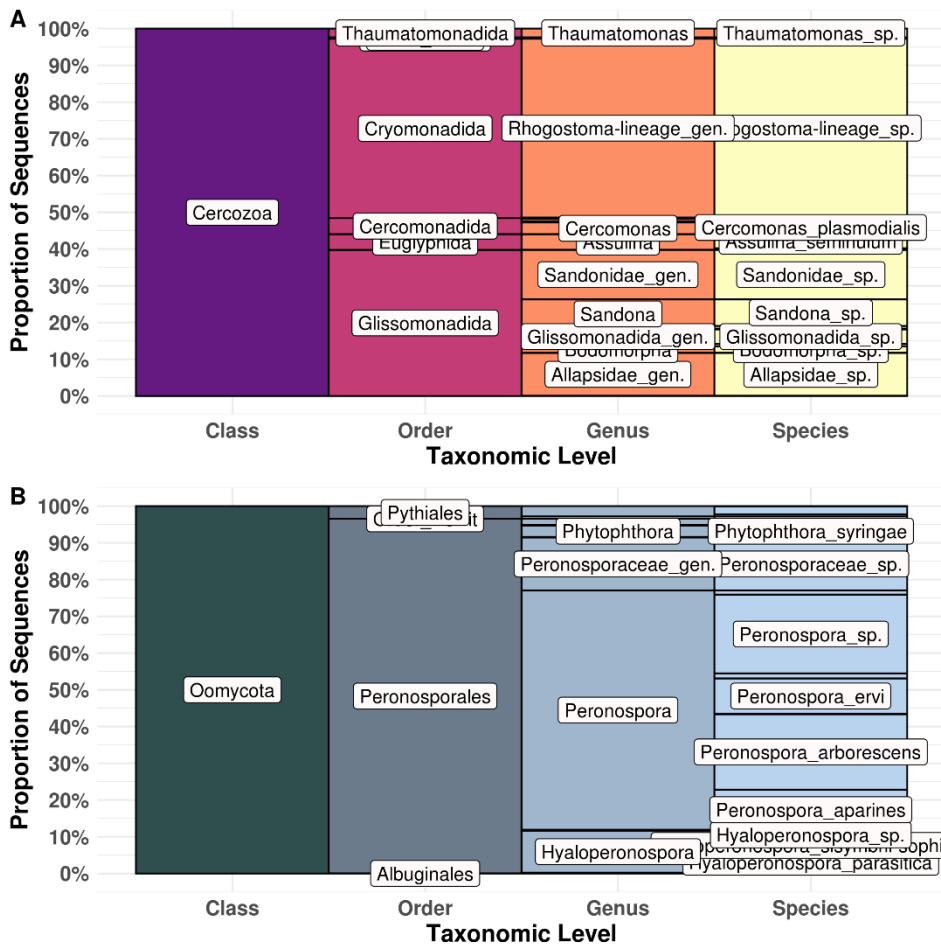

Figure 3: Taxonomic annotation of cercozoan (A) and oomycete (B) OTUs. Labels give the detected orders and the ten most abundant species with their corresponding genus.

186

187 The number of shared OTUs indicated a temporal variation in air dispersal of both protistan  
 188 taxa (Figure 4), and dispersal of cercozoan OTUs varied also spatially between canopy and  
 189 ground at the incidence level.

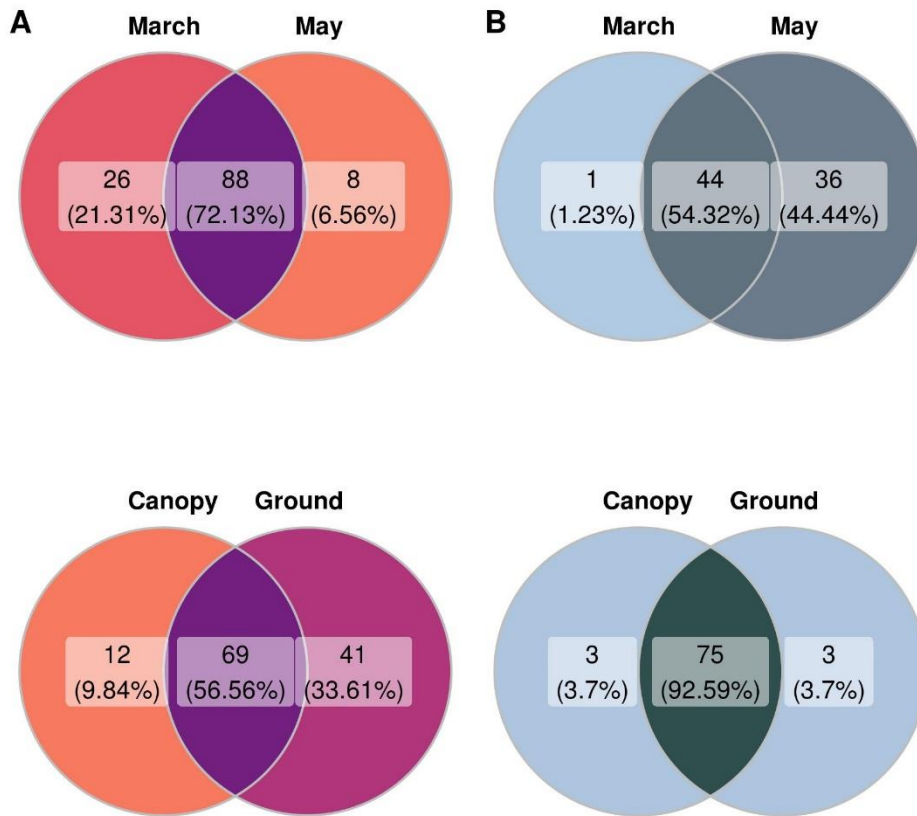

Figure 4: Venn diagram giving the number and proportion of shared OTUs between March and May samples and Canopy and Ground samples, respectively, for Cercozoa (A) and Oomycota (B).

190

191 Partitioning of the taxonomy into the two sampling seasons revealed similar patterns (Figure  
192 5), yet, the cercozoan order Euglyphida was exclusively present in March samples, and  
193 oomycete Pythiales showed a higher abundance in March than in May.

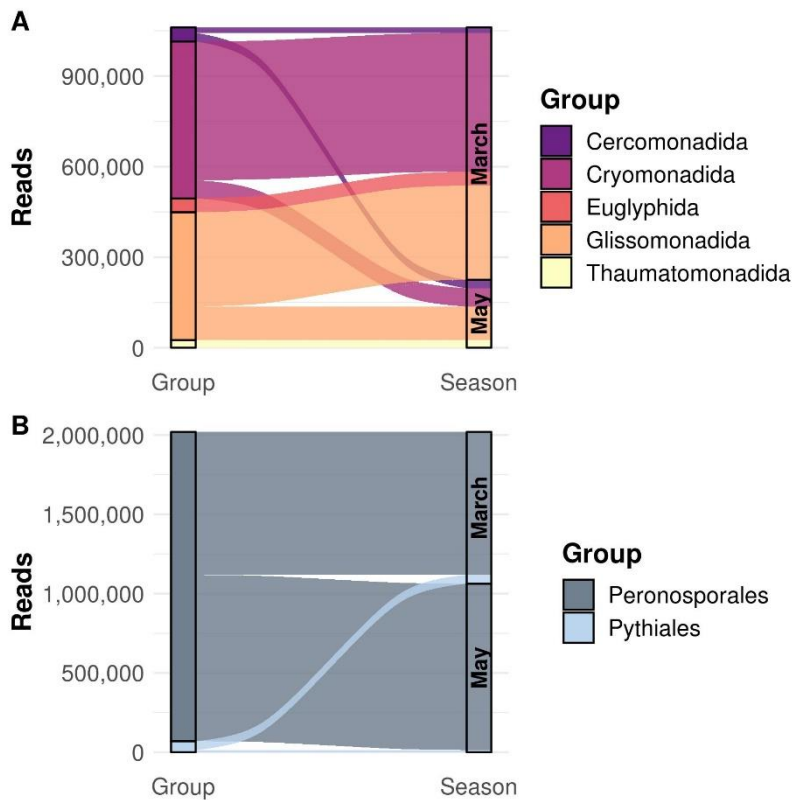

Figure 5: Sankey distribution diagram of cercozoan (A) and oomycete (B) orders in March and May samples. Orders represented by less than 1% of all reads were removed from the visualisation for the sake of clarity.

194

195

## 4. Discussion

196

197

198

199

200

201

202

203

204

205

206

In a recent study, Jauss et al. (2020) quantified the diversity of Oomycota and Cercozoa in canopy microhabitats and in litter and soil on the ground of the same floodplain forest. This allows for a direct comparison of the total diversity of these protists in the forest stand with the potential diversity of taxa distributed by air during two time points. We detected 122 and 81 OTUs of Cercozoa and Oomycota in air samples, respectively, which corresponds to 22 and 24% of the former reported total diversity of these protistan phyla. The high temporal variation, also reflected by the number of shared OTUs (Figure 4), suggests protistan distribution to be not restricted by dispersal-limitation, but rather indicates a continuous propagule rain of potentially invasive species and their accumulating resting stages occupying vacant niches. The vertical distribution of protists in air samples was rather homogeneous and did not differ between tree canopy and ground. In contrast, Jauss et al.

207 (2020) found clear spatial patterns of oomycetes and cercozoans in tree canopies compared  
208 to the forest floor, suggesting that only part of the wind-borne propagule rain finds suitable  
209 conditions for survival in tree crowns due to habitat filtering. The temporal variation could be  
210 either related to temporal variations in the activity and distribution of protists, or more likely  
211 due to a dependency on the weather during the sampling. In March, the conditions were  
212 less favorable, with comparatively low temperatures and humidity with immediate previous  
213 precipitation events that have to be taken into account (Table 1). The remaining ground  
214 moisture might have prevented the lofting of protists through wind currents, while in May the  
215 atmospheric conditions were more preferable with higher average temperatures and a  
216 higher humidity. The conditions in May probably favored the lofting of protists into the  
217 atmosphere and their long-distance dispersal, leading to a higher protistan diversity and  
218 OTU richness (Figure 1), even though the wind speed was slower compared to March (Table  
219 1). As wind speed was determined to be an important factor governing the species richness  
220 of microorganisms in air samples (Rogerson & Detwiler, 1999; Genitsaris et al., 2014), faster  
221 wind speeds in May probably could have revealed more protists. This suggests not a single  
222 factor, but rather the interplay between atmospheric conditions driving the species richness  
223 and community assembly in the air, while our samples possibly only represent the lower  
224 counts of what can be dispersed by air.

225 Wind dispersal is an important means for the distribution of microbial plant pathogens, and  
226 oomycetes are no exception (Fawke et al., 2015; Lang-Yona et al., 2018). Yet,  
227 comprehensive assessments of their abundances within the forest air were lacking. The  
228 presence of ~54% of all oomycete OTUs in both sampling events (Figure 4B) indicates a  
229 continuous presence of both peronosporan and pythialean oomycete spores and  
230 consequently a high proportion of potentially physiologically active oomycetes, including  
231 potential pathogens within forest ecosystems. Oomycetes pose a serious threat to forest  
232 health and functioning, it is therefore crucial to better understand their diversity and

233 distribution patterns of the total forest ecosystem, including air samples (Derevnina et al.,  
234 2016; Ajchler et al., 2017; Jung et al., 2018; Lang-Yona et al., 2018). We detected no OTUs  
235 assigned to the orders Saprolegniales, Lagenidiales or Myzocitiopsidales, even though  
236 Jauss et al. (2020) found them in canopy and ground samples. All three orders are capable  
237 of forming dispersal stages, while their absence in our air samples could be due to a different  
238 timing of their sporulation, as our samples can only represent a snapshot of aerobic diversity.

239 Three dominant cercozoan orders were detected in air samples, but surprisingly no plant  
240 parasites of the Endomyxa. Testate amoebae from the orders Cryomonadida and  
241 Euglyphida occurred in high numbers. Cryomonadida (Thecofilosea) are filose amoeba with  
242 a robust extracellular organic tests (Adl et al., 2019). OTUs assigned to the Rhogostoma-  
243 lineage within the Cryomonadida dominated the samples. *Rhogostoma* species form resting  
244 stages resistant against desiccation for up to three months, although they form no cysts or  
245 zoospores (Mylnikova & Mylnikov, 2012; Öztoprak et al., 2020). *Assulina seminulum*, has a  
246 silica test with a remarkable size of 60-90  $\mu\text{m}$  (Lara et al., 2010), and dominated the air  
247 dispersed Euglyphids, demonstrating that protists of this size can be still easily dispersed  
248 by air (Finlay, 2002). Not surprising was the dominance of Glissomonadida, represented by  
249 small flagellates of the families Sandonidae and Allapsidae. Their high abundance is  
250 consistent with observations Ploch et al (2016) and Jauss et al (2020). All these orders are  
251 an integral part of the protist phyllosphere microbiome (Agler et al., 2016; Dumack et al.,  
252 2017; Flues et al., 2018). Overall, their presence in the microbiome as well as their high  
253 abundance in air samples indicates canopies and their phyllosphere to be a potential filter  
254 not only for dust and particles (Weber et al., 2014; Chen et al., 2017), but also for  
255 microorganisms and potential plant pathogens.

## 256 Conclusion

257 A significant temporal variation in oomycetes indicates protistan community and,  
258 correspondingly, pathogen assembly to be driven by random factors and neutral processes,

259 while spatial differences in the vertical distribution of cercozoans and oomycetes were not  
260 found. Accordingly, wind dispersal alone may well explain the ubiquitous presence of  
261 Cercozoa and Oomycota (and likely of other protistan taxa) in the floodplain forest. Our  
262 results further contribute to the understanding of how protists disperse, and which factors  
263 drive the distribution of plant pathogens within forest ecosystems.

## 264 Acknowledgements

265 This paper was supported by the Priority Program SPP 1991: Taxon-omics – New  
266 Approaches for Discovering and Naming Biodiversity of the German Research Foundation  
267 (DFG) with funding to MB (1907/19-1) and MS (Schl 229/20-1). The authors would like to  
268 thank Rolf Engelmann for his assistance with the field work by operating the canopy crane,  
269 and the German Centre for Integrative Biodiversity Research (iDiv) for providing the site  
270 access.

## 271 Conflict of Interest

272 None declared

## 273 Author Contributions

274 MS and MB conceived the study, RW and StS designed the sampling. BS assisted the library  
275 preparation. SW assisted the sampling and contributed valuably to the discussion. AN  
276 performed the sampling, laboratory work, bioinformatics analyses and outline of the  
277 manuscript. R-TJ supervised the study, sampling and bioinformatic analyses, and wrote the  
278 manuscript. All authors contributed to the manuscript and approved the final version.

## 279 Data availability

280 Raw sequence data have been submitted to the European Nucleotide Archive (ENA)  
281 database under the Bioproject number PRJEB37525, with accession numbers ERS5388855  
282 (Cercozoa) and ERS5388854 (Oomycota) respectively.

283 All figures, codes and detailed bioinformatic/statistical methods used in this study are  
284 available at <https://github.com/RJauss/ToTheCanopyAndBeyond>.

## 285 References

- 286  
287 Adl, S. M., Bass, D., Lane, C. E., Lukeš, J., Schoch, C. L., Smirnov, A., Agatha, S., Berney, C.,  
288 Brown, M. W., Burki, F., Cárdenas, P., Čepička, I., Chistyakova, L., del Campo, J., Dunthorn,  
289 M., Edvardsen, B., Eglit, Y., Guillou, L., Hampl, V., ... Zhang, Q. (2019). Revisions to the  
290 Classification, Nomenclature, and Diversity of Eukaryotes. *Journal of Eukaryotic*  
291 *Microbiology*, 66(1), 4–119. <https://doi.org/10.1111/jeu.12691>  
292 Adl, S. M., & Gupta, V. S. R. (2006). Protists in soil ecology and forest nutrient cycling. In  
293 *Canadian Journal of Forest Research* (Vol. 36, Issue 7, pp. 1805–1817).  
294 <https://doi.org/10.1139/X06-056>  
295 Agler, M. T., Ruhe, J., Kroll, S., Morhenn, C., Kim, S. T., Weigel, D., & Kemen, E. M. (2016).  
296 Microbial Hub Taxa Link Host and Abiotic Factors to Plant Microbiome Variation. *PLoS*  
297 *Biology*, 14(1), e1002352. <https://doi.org/10.1371/journal.pbio.1002352>  
298 Ajchler, M., Łobocka, M., & Oszako, T. (2017). Pathogenic oomycetes of Phytophthora genus - a  
299 new threat to forests in Europe. *Sylvan*, 161(10), 870–880. <https://sylvan.lasy.gov.pl/>  
300 Amato, P., Ménager, M., Sancelme, M., Laj, P., Mailhot, G., & Delort, A.-M. (2005). Microbial  
301 population in cloud water at the Puy de Dôme: Implications for the chemistry of clouds.  
302 *Atmospheric Environment*, 39(22), 4143–4153. <https://doi.org/10.1016/j.atmosenv.2005.04.002>  
303 Bass, D., Howe, A. T., Mylnikov, A. P., Vickerman, K., Chao, E. E., Edwards Smallbone, J., Snell,  
304 J., Cabral Jr, C., & Cavalier-Smith, T. (2009). Phylogeny and Classification of Cercomonadida  
305 (Protozoa, Cercozoa): Cercomonas, Eocercomonas, Paracercomonas, and Cavernomonas gen.  
306 nov. *Protist*, 160, 483–521. <https://doi.org/10.1016/j.protis.2009.01.004>  
307 Cavalier-Smith, T., Chao, E. E., & Lewis, R. (2018). Multigene phylogeny and cell evolution of  
308 chromist infrakingdom Rhizaria: contrasting cell organisation of sister phyla Cercozoa and  
309 Retaria. *Protoplasma*, 255, 1517–1574. <https://doi.org/10.1007/s00709-018-1241-1>  
310 Chen, L., Liu, C., Zhang, L., Zou, R., & Zhang, Z. (2017). Variation in Tree Species Ability to  
311 Capture and Retain Airborne Fine Particulate Matter (PM2.5). *Scientific Reports*, 7(1), 3206.  
312 <https://doi.org/10.1038/s41598-017-03360-1>  
313 Cowling, A. J. (1994). Protozoan distribution and adaptation. In J. Darbyshire (Ed.), *Soil Protozoa*  
314 (pp. 5–42). CAB International.  
315 Derevnina, L., Petre, B., Kellner, R., Dagdas, Y. F., Sarowar, M. N., Giannakopoulou, A., de la  
316 Concepcion, J. C., Chaparro-Garcia, A., Pennington, H. G., van West, P., & Kamoun, S.  
317 (2016). Emerging oomycete threats to plants and animals. In *Philosophical Transactions of the*  
318 *Royal Society B: Biological Sciences* (Vol. 371, Issue 1709). Royal Society of London.  
319 <https://doi.org/10.1098/rstb.2015.0459>  
320 Dumack, K., Flues, S., Hermanns, K., & Bonkowski, M. (2017). Rhogostomidae (Cercozoa) from  
321 soils, roots and plant leaves (*Arabidopsis thaliana*): Description of *Rhogostoma epiphylla* sp.  
322 nov. and *R. cylindrica* sp. nov. *European Journal of Protistology*, 60, 76–86.  
323 <https://doi.org/10.1016/j.ejop.2017.06.001>  
324 Ellwood, M. D. F., & Foster, W. A. (2004). Doubling the estimate of invertebrate biomass in a  
325 rainforest canopy. *Nature*, 429(6991), 549–551. <https://doi.org/10.1038/nature02560>  
326 Evans, S. E., Dueker, M. E., Logan, J. R., & Weathers, K. C. (2019). The biology of fog: results  
327 from coastal Maine and Namib Desert reveal common drivers of fog microbial composition.  
328 *Science of The Total Environment*, 647, 1547–1556.  
329 <https://doi.org/10.1016/j.scitotenv.2018.08.045>  
330 Fawke, S., Doumane, M., & Schornack, S. (2015). Oomycete Interactions with Plants: Infection  
331 Strategies and Resistance Principles. *Microbiology and Molecular Biology Reviews*, 79(3),



- 332 263–280. <https://doi.org/10.1128/membr.00010-15>
- 333 Fenchel, T., & Finlay, B. J. (2004). The Ubiquity of Small Species: Patterns of Local and Global  
334 Diversity. *BioScience*, 54(8), 777–784. [https://doi.org/10.1641/0006-](https://doi.org/10.1641/0006-3568(2004)054[0777:TUOSSP]2.0.CO;2)  
335 3568(2004)054[0777:TUOSSP]2.0.CO;2
- 336 Finlay, B. J. (2002). Global Dispersal of Free-Living Microbial Eukaryote Species. *Science*, 296,  
337 1061–1063. <https://doi.org/10.1126/science.1070710>
- 338 Finlay, B. J., Esteban, G. F., Clarke, K. J., & Olmo, J. L. (2001). Biodiversity of Terrestrial Protozoa  
339 Appears Homogeneous across Local and Global Spatial Scales. *Protist*, 152, 355–366.  
340 <https://doi.org/10.1078/1434-4610-00073>
- 341 Fiore-Donno, A. M., & Bonkowski, M. (2020). Different community compositions between  
342 obligate and facultative oomycete plant parasites in a landscape-scale metabarcoding survey.  
343 *Biology and Fertility of Soils*. <https://doi.org/10.1007/s00374-020-01519-z>
- 344 Fiore-Donno, A. M., Richter-Heitmann, T., & Bonkowski, M. (2020). Contrasting Responses of  
345 Protistan Plant Parasites and Phagotrophs to Ecosystems, Land Management and Soil  
346 Properties. *Frontiers in Microbiology*, 11, 1823. <https://doi.org/10.3389/fmicb.2020.01823>
- 347 Flues, S., Blokker, M., Dumack, K., & Bonkowski, M. (2018). Diversity of Cercomonad Species in  
348 the Phyllosphere and Rhizosphere of Different Plant Species with a Description of  
349 *Neocercomonas epiphylla* (Cercozoa, Rhizaria) a Leaf-Associated Protist. *Journal of*  
350 *Eukaryotic Microbiology*, 65, 587–599. <https://doi.org/10.1111/jeu.12503>
- 351 Foissner, W. (2009). Protist diversity and distribution: some basic considerations. In W. Foissner &  
352 D. L. Hawksworth (Eds.), *Protist Diversity and Geographical Distribution* (pp. 1–8).  
353 [https://doi.org/10.1007/978-90-481-2801-3\\_1](https://doi.org/10.1007/978-90-481-2801-3_1)
- 354 Foissner, W., & Hawksworth, D. L. (Eds.). (2009). *Protist Diversity and Geographical Distribution*  
355 (Vol. 8). Springer Netherlands. <https://doi.org/10.1007/978-90-481-2801-3>
- 356 Fuzzi, S., Mandrioli, P., & Perfetto, A. (1997). Fog droplets—an atmospheric source of secondary  
357 biological aerosol particles. *Atmospheric Environment*, 31(2), 287–290.  
358 [https://doi.org/10.1016/1352-2310\(96\)00160-4](https://doi.org/10.1016/1352-2310(96)00160-4)
- 359 Geisen, S., Mitchell, E. A. D., Wilkinson, D. M., Adl, S., Bonkowski, M., Brown, M. W., Fiore-  
360 Donno, A. M., Heger, T. J., Jassey, V. E. J., Krashevskaya, V., Lahr, D. J. G., Marcisz, K., Mulot,  
361 M., Payne, R., Singer, D., Anderson, O. R., Charman, D. J., Ekelund, F., Griffiths, B. S., ...  
362 Lara, E. (2017). Soil protistology rebooted: 30 fundamental questions to start with. In *Soil*  
363 *Biology and Biochemistry* (Vol. 111, pp. 94–103). <https://doi.org/10.1016/j.soilbio.2017.04.001>
- 364 Genitsaris, S., Kormas, K. A., Christaki, U., Monchy, S., & Moustaka-Gouni, M. (2014). Molecular  
365 diversity reveals previously undetected air-dispersed protist colonists in a Mediterranean area.  
366 *Science of the Total Environment*, 478, 70–79. <https://doi.org/10.1016/j.scitotenv.2014.01.071>
- 367 Goheen, E. M., & Frankel, S. J. (2009). Proceedings of the fourth meeting of the International  
368 Union of Forest Research Organizations (IUFRO) Working Party S07.02.09: Phytophthoras in  
369 forests and natural ecosystems. In *Gen. Tech. Rep. PSW-GTR-221*. Albany, CA: U.S.  
370 *Department of Agriculture, Forest Service, Pacific Southwest Research Station*. 334 p (Vol.  
371 221). <https://doi.org/10.2737/PSW-GTR-221>
- 372 Guillou, L., Bachar, D., Audic, S., Bass, D., Berney, C., Bittner, L., Boutte, C., Burgaud, G., De  
373 Vargas, C., Decelle, J., Del Campo, J., Dolan, J. R., Dunthorn, M., Edvardsen, B., Holzmann,  
374 M., Kooistra, W. H. C. F., Lara, E., Le Bescot, N., Logares, R., ... Christen, R. (2013). The  
375 Protist Ribosomal Reference database (PR2): A catalog of unicellular eukaryote Small Sub-  
376 Unit rRNA sequences with curated taxonomy. *Nucleic Acids Research*, 41(D1), D597–D604.  
377 <https://doi.org/10.1093/nar/gks1160>
- 378 Harder, C. B., Rønn, R., Brejnrod, A., Bass, D., Al-Soud, W. A., & Ekelund, F. (2016). Local  
379 diversity of heathland Cercozoa explored by in-depth sequencing. *ISME Journal*, 10(10),  
380 2488–2497. <https://doi.org/10.1038/ismej.2016.31>
- 381 Jauss, R.-T., Walden, S., Fiore-Donno, A.-M., Dumack, K., Schaffer, S., Wolf, R., Schlegel, M., &  
382 Bonkowski, M. (2020). From forest soil to the canopy: increased habitat diversity does not  
383 increase species richness of Cercozoa and Oomycota in tree canopies. *Authorea Preprints*.

- 384 <https://doi.org/10.22541/AU.158679920.02842084>
- 385 Jousset, A., Lara, E., Wall, L. G., & Valverde, C. (2006). Secondary metabolites help biocontrol  
386 strain *Pseudomonas fluorescens* CHA0 to escape protozoan grazing. *Applied and*  
387 *Environmental Microbiology*, 72(11), 7083–7090. <https://doi.org/10.1128/AEM.00557-06>
- 388 Judelson, H. S. (2017). Metabolic Diversity and Novelty in the Oomycetes. *Annual Review of*  
389 *Microbiology*, 71, 21–39. <https://doi.org/10.1146/annurev-micro-090816-093609>
- 390 Jung, T., Pérez-Sierra, A., Durán, A., Jung, M. H., Balci, Y., & Scanu, B. (2018). Canker and decline  
391 diseases caused by soil- and airborne *Phytophthora* species in forests and woodlands. In  
392 *Persoonia: Molecular Phylogeny and Evolution of Fungi* (Vol. 40, pp. 182–220). Nationaal  
393 Herbarium Nederland. <https://doi.org/10.3767/persoonia.2018.40.08>
- 394 Kageyama, K., & Asano, T. (2009). Life cycle of plasmodiophora brassicae. *Journal of Plant*  
395 *Growth Regulation*, 28(3), 203–211. <https://doi.org/10.1007/s00344-009-9101-z>
- 396 Lang-Yona, N., Pickersgill, D. A., Maurus, I., Teschner, D., Wehking, J., Thines, E., Pöschl, U.,  
397 Després, V. R., & Fröhlich-Nowoisky, J. (2018). Species Richness, rRNA Gene Abundance,  
398 and Seasonal Dynamics of Airborne Plant-Pathogenic Oomycetes. *Frontiers in Microbiology*,  
399 9(NOV), 2673. <https://doi.org/10.3389/fmicb.2018.02673>
- 400 Lara, E., & Belbahri, L. (2011). SSU rRNA reveals major trends in oomycete evolution. *Fungal*  
401 *Diversity*, 49, 93–100. <https://doi.org/10.1007/s13225-011-0098-9>
- 402 Lara, E., Heger, T. J., Scheihing, R., & Mitchell, E. A. D. (2010). COI gene and ecological data  
403 suggest size-dependent high dispersal and low intra-specific diversity in free-living terrestrial  
404 protists (Euglyphida: Assulina): High dispersal in testate amoebae. *Journal of Biogeography*,  
405 38(4), 640–650. <https://doi.org/10.1111/j.1365-2699.2010.02426.x>
- 406 Mahé, F., Rognes, T., Quince, C., de Vargas, C., & Dunthorn, M. (2015). Swarm v2: highly-scalable  
407 and high-resolution amplicon clustering. *PeerJ*, 3, 1–12. <https://doi.org/10.7717/peerj.1420>
- 408 Martin, M. (2011). Cutadapt removes adapter sequences from high-throughput sequencing reads.  
409 *EMBnet Journal*, 17(1), 10. <https://doi.org/10.14806/ej.17.1.200>
- 410 Meyer, M., & Kircher, M. (2010). Illumina Sequencing Library Preparation for Highly Multiplexed  
411 Target Capture and Sequencing. *Cold Spring Harbor Protocols*, 2010(6), pdb.prot5448--  
412 pdb.prot5448. <https://doi.org/10.1101/pdb.prot5448>
- 413 Moon-van der Staay, S. Y., Tzeneva, V. A., Van Der Staay, G. W. M., De Vos, W. M., Smidt, H., &  
414 Hackstein, J. H. P. (2006). Eukaryotic diversity in historical soil samples. *FEMS Microbiology*  
415 *Ecology*, 57(3), 420–428. <https://doi.org/10.1111/j.1574-6941.2006.00130.x>
- 416 Mylnikova, Z. M., & Mylnikov, A. P. (2012). Structure of filose amoeba *Rhagostoma minus* Belar  
417 1921 (Cryomonadida, Cercozoa) cell. *Inland Water Biology*, 5(3), 236–240.  
418 <https://doi.org/10.1134/S1995082912020101>
- 419 Oksanen, J., Blanchet, F. G., Friendly, M., Kindt, R., Legendre, P., McGlenn, D., Minchin, P. R.,  
420 O’Hara, R. B., Simpson, G. L., Solymos, P., Stevens, M. H. H., Szoecs, E., & Wagner, H.  
421 (2019). *vegan: Community Ecology Package*. <https://cran.r-project.org/package=vegan>
- 422 Ozanne, C. H. P., Anhuf, D., Boulter, S. L., Keller, H., Kitching, R. L., Körner, C., Meinzer, F. C.,  
423 Mitchell, A. W., Nakashizuka, T., Silva Dias, P. L., Stork, N. E., Wright, S. J., & Yoshimura,  
424 M. (2003). Biodiversity meets the atmosphere: A global view of forest canopies. In *Science*  
425 (Vol. 301, Issue 5630, pp. 183–186). American Association for the Advancement of Science.  
426 <https://doi.org/10.1126/science.1084507>
- 427 Öztoprak, H., Walden, S., Heger, T., Bonkowski, M., & Dumack, K. (2020). What drives the  
428 diversity of the most abundant terrestrial cercozoan family (Rhagostomidae, cercozoa,  
429 rhizaria)? *Microorganisms*, 8(8), 1–16. <https://doi.org/10.3390/microorganisms8081123>
- 430 Pedersen, T. L. (2020). *ggraph: An Implementation of Grammar of Graphics for Graphs and*  
431 *Networks* (2.0.3). <https://cran.r-project.org/package=ggraph>
- 432 Pepper, I. L., & Dowd, S. E. (2009). Aeromicrobiology. In R. M. Maier, I. L. Pepper, & C. P. Gerba  
433 (Eds.), *Environmental Microbiology (Second Edition)* (Second Edi, pp. 83–102). Academic  
434 Press. <https://doi.org/https://doi.org/10.1016/B978-0-12-370519-8.00005-5>
- 435 Petz, W., & Foissner, W. (1988). Spatial separation of terrestrial ciliates and testaceans (Protozoa): a

- 436 contribution to soil ciliatostasis. *Acta Protozoologica*, 27(3), 249–258.
- 437 Ploch, S., Rose, L. E., Bass, D., & Bonkowski, M. (2016). High Diversity Revealed in Leaf-  
438 Associated Protists (Rhizaria: Cercozoa) of Brassicaceae. *The Journal of Eukaryotic*  
439 *Microbiology*, 63(5), 635–641. <https://doi.org/10.1111/jeu.12314>
- 440 R Core Team. (2019). *R: A Language and Environment for Statistical Computing*. [https://www.r-](https://www.r-project.org/)  
441 [project.org/](https://www.r-project.org/)
- 442 Robideau, G. P., De Cock, A. W. A. M., Coffey, M. D., Voglmayr, H., Brouwer, H., Bala, K., Chitty,  
443 D. W., Désaulniers, N., Eggertson, Q. A., Gachon, C. M. M., Hu, C. H., Küpper, F. C., Rintoul,  
444 T. L., Sarhan, E., Verstappen, E. C. P., Zhang, Y., Bonants, P. J. M., Ristaino, J. B., & André  
445 Lévesque, C. (2011). DNA barcoding of oomycetes with cytochrome c oxidase subunit I and  
446 internal transcribed spacer. *Molecular Ecology Resources*, 11(6), 1002–1011.  
447 <https://doi.org/10.1111/j.1755-0998.2011.03041.x>
- 448 Rogerson, A., & Detwiler, A. (1999). Abundance of airborne heterotrophic protists in ground level  
449 air of South Dakota. *Atmospheric Research*, 51, 35–44. [https://doi.org/10.1016/S0169-](https://doi.org/10.1016/S0169-8095(98)00109-4)  
450 [8095\(98\)00109-4](https://doi.org/10.1016/S0169-8095(98)00109-4)
- 451 Rognes, T., Flouri, T., Nichols, B., Quince, C., & Mahé, F. (2016). VSEARCH: A versatile open  
452 source tool for metagenomics. *PeerJ*, 2016(10). <https://doi.org/10.7717/peerj.2584>
- 453 Thines, M. (2014). Phylogeny and evolution of plant pathogenic oomycetes—a global overview.  
454 *European Journal of Plant Pathology*, 138(3), 431–447. [https://doi.org/10.1007/s10658-013-](https://doi.org/10.1007/s10658-013-0366-5)  
455 [0366-5](https://doi.org/10.1007/s10658-013-0366-5)
- 456 Urich, T., Lanzén, A., Qi, J., Huson, D. H., Schleper, C., & Schuster, S. C. (2008). Simultaneous  
457 Assessment of Soil Microbial Community Structure and Function through Analysis of the  
458 Meta-Transcriptome. *PLoS ONE*, 3(6), e2527. <https://doi.org/10.1371/journal.pone.0002527>
- 459 Voss, C., Fiore-Donno, A. M., Guerreiro, M. A., Peršoh, D., & Bonkowski, M. (2019).  
460 Metatranscriptomics reveals unsuspected protistan diversity in leaf litter across temperate  
461 beech forests, with Amoebozoa the dominating lineage. *FEMS Microbiology Ecology*, 95(10),  
462 142. <https://doi.org/10.1093/femsec/fiz142>
- 463 Weber, F., Kowarik, I., & Säumel, I. (2014). Herbaceous plants as filters: Immobilization of  
464 particulates along urban street corridors. *Environmental Pollution*, 186, 234–240.  
465 <https://doi.org/https://doi.org/10.1016/j.envpol.2013.12.011>
- 466 Wickham, H. (2016). *ggplot2: Elegant Graphics for Data Analysis*. Springer-Verlag New York.  
467 <https://ggplot2.tidyverse.org>  
468
